# Supplementary material for: Generation of a variety of stable Influenza A reporter viruses by genetic engineering of the NS gene segment
Source: PubMed Central journal article supplement (PMC4464305; doi:10.1038/srep11346), 2015-06-12
Supplement: srep11346-s1.pdf [file srep11346-s1.pdf]

## Supplementary information

### Generation of a variety of stable Influenza A reporter viruses by genetic engineering of the NS gene segment

Peter Reuther<sup>1,2,§</sup>, Kristina Göpfert<sup>1,§</sup>, Alexandra H. Dudek<sup>1,2,3</sup>, Monika Heiner<sup>4</sup>, Susanne Herold<sup>4</sup> and Martin Schwemmle<sup>1,\*</sup>

<sup>1</sup>Institute for Virology, <sup>2</sup>Faculty of Biology, <sup>3</sup>Spemann Graduate School of Biology and Medicine (SGBM), University of Freiburg, 79104 Freiburg, Germany and <sup>4</sup>Department of Internal Medicine (Pulmonology), University of Giessen and Marburg Lung Center, German Center for Lung Research, D-35392 Giessen, Germany

<sup>§</sup>These authors contributed equally to this work

\*Correspondence to:

**Dr. Martin Schwemmle**

Institute for Virology

Department of Medical Microbiology and Hygiene

University of Freiburg

Hermann-Herder-Strasse 11

D-79104 Freiburg, Germany

Phone: +49-761-203-6526

Fax: +49-761-203-6639

e-mail: martin.schwemmle@uniklinik-freiburg.de

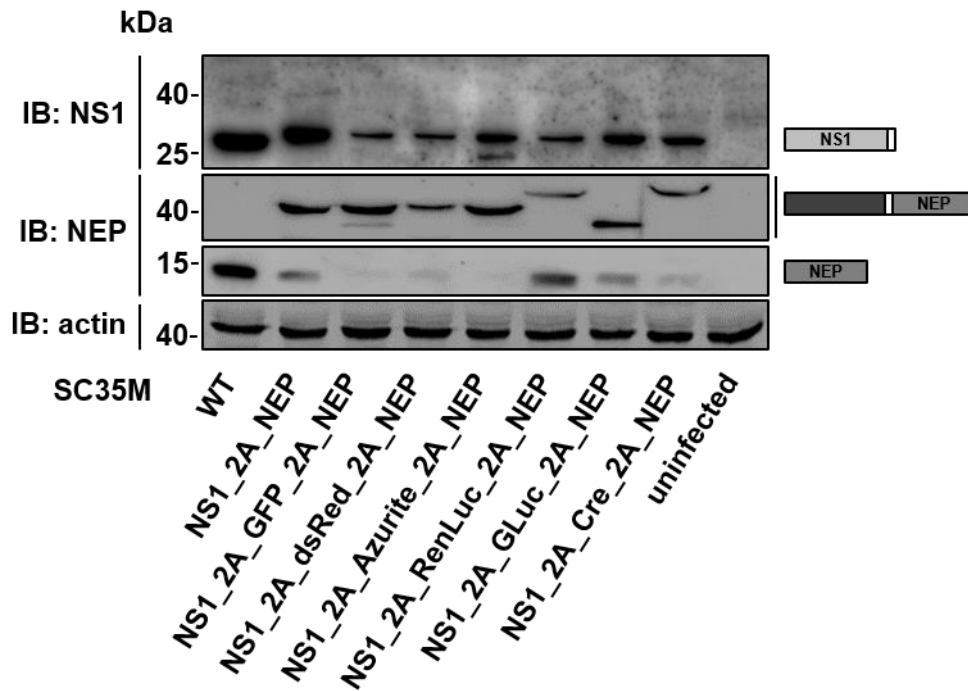

**Fig.S1 NS1 and NEP protein expression levels of SC35M reporter viruses.** Determination of expression levels of NS1 and NEP in A549 cells infected with SC35M<sub>WT</sub>, SC35M<sub>NS1\_2A\_NEP</sub> and the respective reporter viruses. Cartoons indicate the approximate size of NS1\_2A, NEP-fusion proteins and NEP. Approximate molecular weight of NS1: 25kDa; NEP: 14kDa; GFP, dsRed, Azurite: 27kDa; Renilla-Luciferase: 36kDa; Gaussia-Luciferase: 20kDa, Cre-recombinase: 38kDa.
